# Supplementary material for: The Remodeling Effects of High-Concentrate Diets on Microbial Composition and Function in the Hindgut of Dairy Cows
Source: PubMed Central journal article supplement (PMC8845480; doi:10.3389/fnut.2021.809406), 2022-02-01
Supplement: Image_1.pdf [file Image_1.pdf]

## *Supplementary Material*

### **Supplementary Tables**

**Supplementary Table 1** Ingredients and chemical composition of diets.

| Ingredients (% of DM) <sup>a</sup> | LC    | HC    |
|------------------------------------|-------|-------|
| Alfalfa hay                        | 27.00 | 12.00 |
| Leymus chinensis                   | 3.00  | 4.00  |
| Straw                              | 0.00  | 4.00  |
| Maize silage                       | 30.00 | 10.00 |
| Maize                              | 20.00 | 45.00 |
| Wheat bran                         | 0.00  | 1.40  |
| Soybean meal                       | 10.85 | 15.00 |
| cottonseed meal                    | 6.00  | 5.00  |
| Calcium carbonate                  | 0.40  | 0.85  |
| Calcium hydrogen phosphate         | 0.75  | 0.75  |
| Sodium bicarbonate                 | 0.75  | 0.75  |
| Sodium chloride                    | 0.50  | 0.50  |
| Dairy premix <sup>b</sup>          | 0.75  | 0.75  |
| Nutrient composition (% of DM)     |       |       |
| NEL(Mcal kg <sup>-1</sup> of DM)   | 1.54  | 1.71  |
| Crude protein (CP)                 | 15.8  | 15.8  |
| Neutral detergent fiber (NDF)      | 34.9  | 24.7  |
| Acid detergent fiber               | 23.0  | 13.2  |
| Non-fiber carbohydrates (NFC)      | 36.1  | 46.3  |
| Calcium                            | 0.88  | 0.82  |
| Phosphorous                        | 0.51  | 0.53  |

<sup>a</sup> Fed as TMR.

<sup>b</sup> Contained Mn, 0.24%; K, 0.5%; S, 0.2%; Zn, 4,000 mg kg<sup>-1</sup>; Cu, 1,000 mg kg<sup>-1</sup>; Mn, 2,500 mg kg<sup>-1</sup>; I, 64 mg kg<sup>-1</sup>; Co, 5 mg kg<sup>-1</sup>; vitamin A, 1,000,000 IU kg<sup>-1</sup>; vitamin D, 110,000 IU kg<sup>-1</sup>, and vitamin E, 6000,000 IU kg<sup>-1</sup>.

LC= low concentrate diet, HC= high concentrate diet

## Supplementary Figures

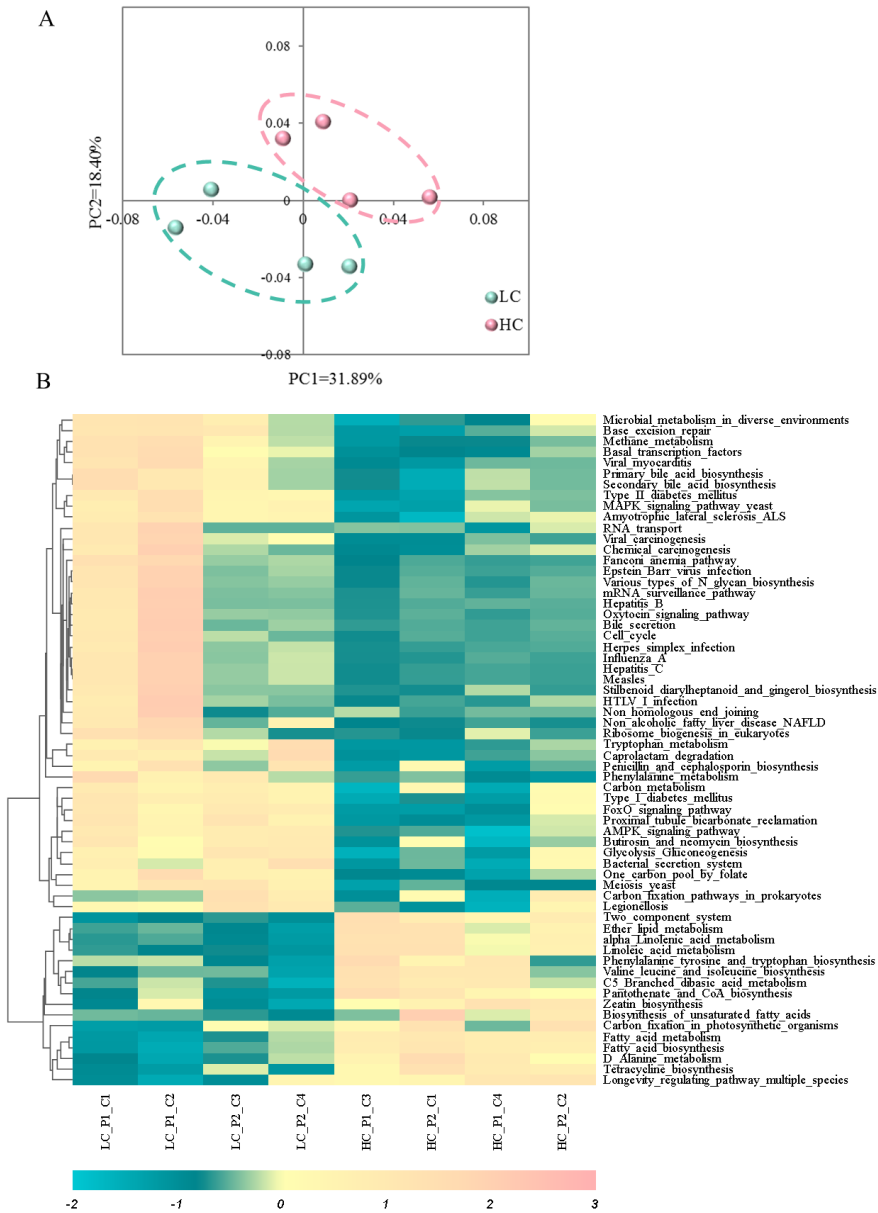

**Supplementary Figure 1** Effects of high-concentrate (HC) diets on KEGG profiles of fecal microbiota of dairy cows. (A) The principal coordinate analysis (PCoA) of fecal microbial functions at KEGG pathway level 3; (B) comparison of microbial functions at KEGG level 3 based on Bray-Curtis dissimilarity matrix.

A

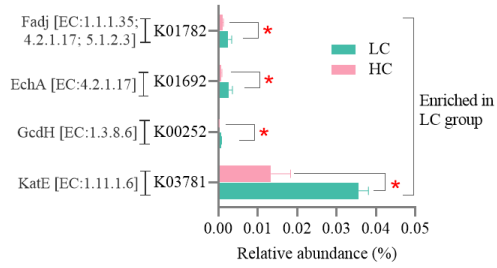

B

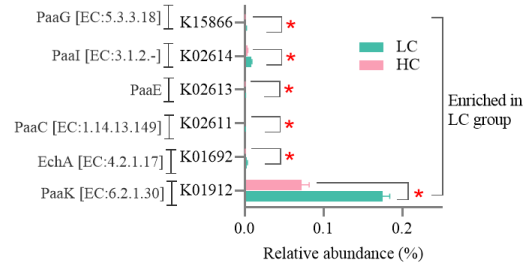

C

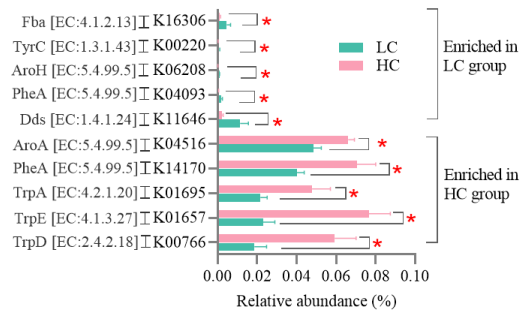

D

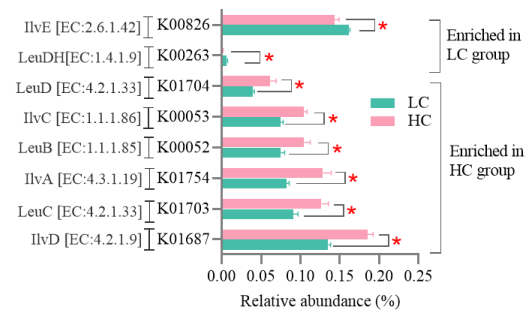

**Supplementary Figure 2** Effects of high-concentrate (HC) feeding on microbial genes involved in amino acid metabolism in the hindgut of dairy cows. Only the affected pathways related to amino acids were presented.

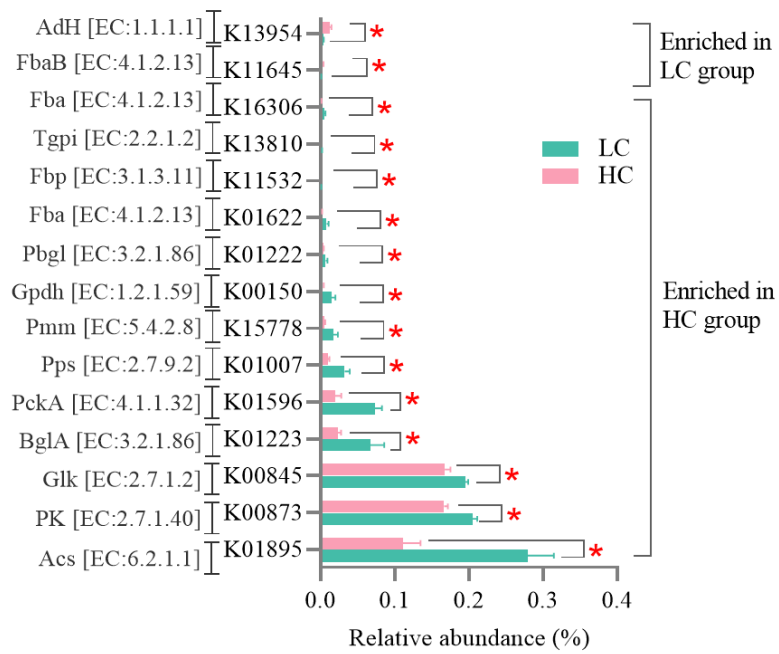

**Supplementary Figure 3** Effects of high-concentrate (HC) feeding on microbial genes involved in the pathway—Glycolysis/Gluconeogenesis in the hindgut of dairy cows.
